# Supplementary material for: Transforming a CO2 Adsorbent to a RWGS Catalyst by Controlling MgO Defects with Ce Single Atoms
Source: Research Square preprint supplement (doi:10.21203/rs.3.rs-4716142/v1), 2024-07-31
Supplement: Supplementary file 2 [file 9e959d0e2548e5e3a6838d07.pdf]

## EXTENDED DATA

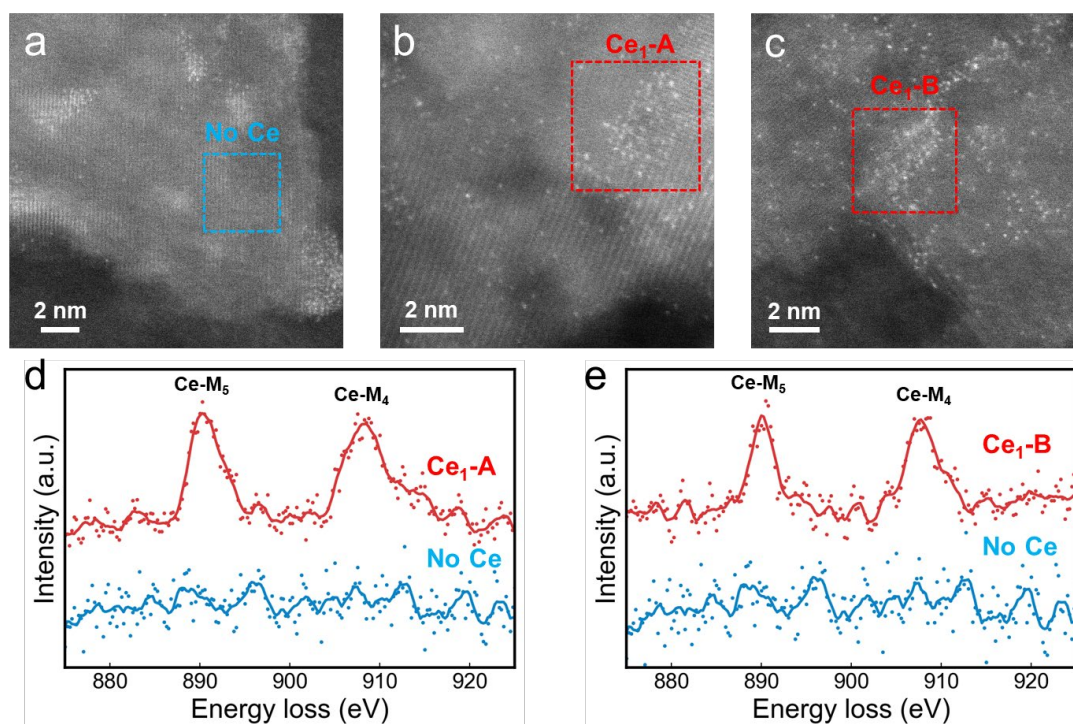

**Extended Data Figure 1 | Microscopy characterizations of Ce-MgO-D(1.6).** (a-c) Atomic resolution STEM-ADF images of Ce-MgO-D(1.6) catalyst and the corresponding regions of STEM-EELS. Three representative regions were selected for Ce-MgO-D(1.6) catalyst: blue square on the MgO without Ce atom (No Ce), red square on the MgO with Ce atom (Ce<sub>1</sub>-A, and Ce<sub>1</sub>-B). (d, e) EELS spectra of marked regions for Ce-MgO-D(1.6) in a, b and c, respectively.

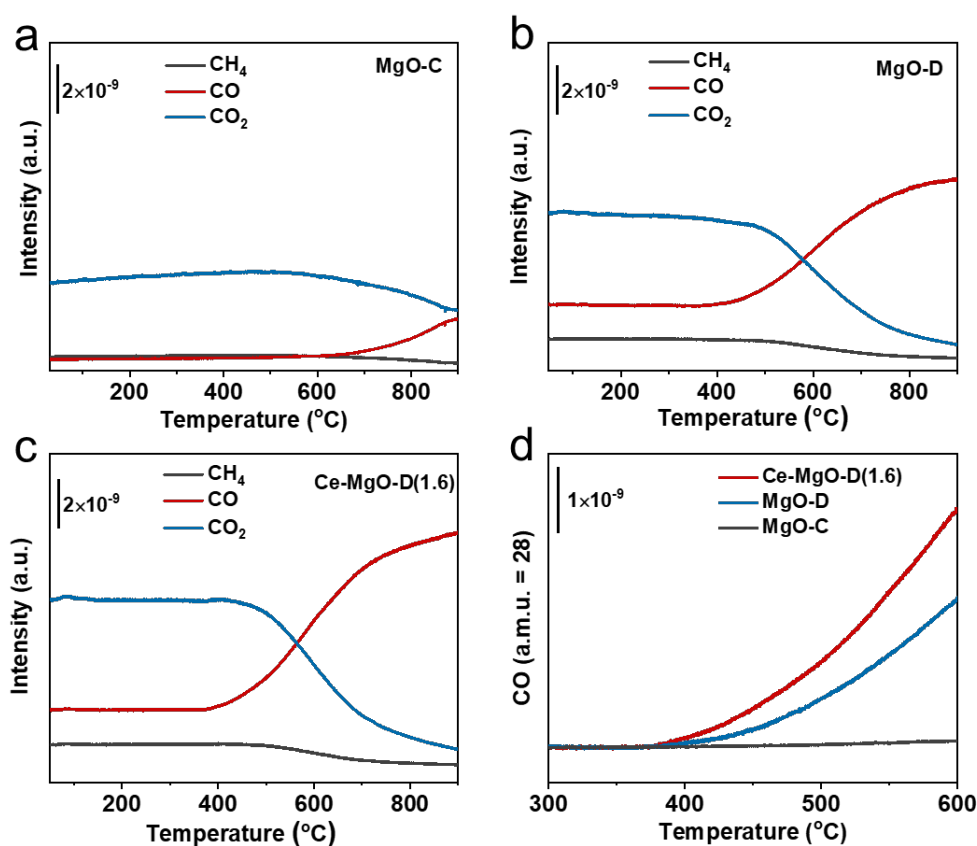

**Extended Data Fig. 2 | Surface evolution reaction. a-c,** CO<sub>2</sub>-TPSR profiles of MgO-C (a), MgO-D (b) and Ce-MgO-D(1.6) (c) catalysts. **d,** Mass spectral (MS) signals of CO ( $m/z = 28$ ) in TPSR experiments for the MgO-C, MgO-D and Ce-MgO-D(1.6) catalysts. From the profile for the formation of carbon monoxide during TPSR, a lower onset temperature over Ce-MgO-D(1.6) catalyst was found. Meanwhile, the CO formation rate of Ce-MgO-D(1.6) was higher than the pure MgO-D and MgO-C catalysts, indicating the Ce-MgO-D(1.6) has much higher activity in the RWGS reaction.

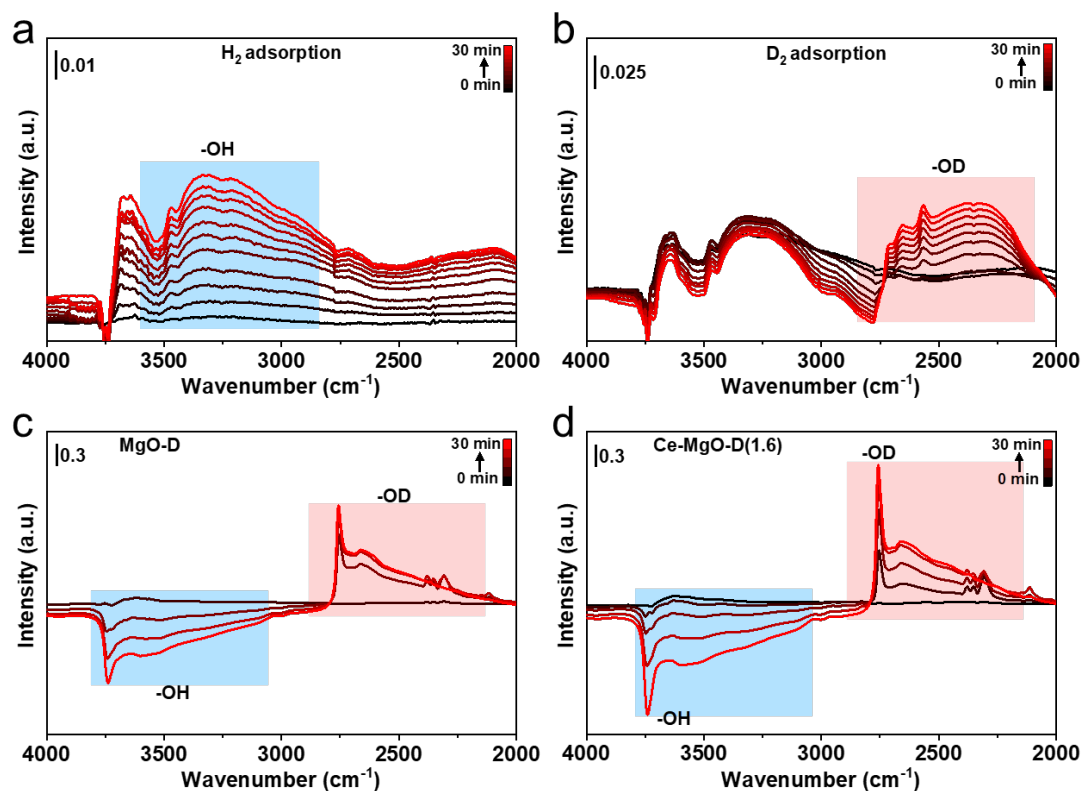

**Extended Data Fig. 3 | H-D isotopic exchange DRIFT spectra.** In situ DRIFTS spectra of the Ce-MgO-D(1.6) treated with **a)** H<sub>2</sub> and **b)** D<sub>2</sub> at room temperature. The sample was first reduced at 500 °C in H<sub>2</sub> and then switched to Ar, the background spectrum was collected at room temperature in Ar. Ce-MgO-D(1.6) show an enhanced number of hydroxy group (-OH, the wide infrared band between 3600-2800 cm<sup>-1</sup>) during H<sub>2</sub> flow. Similarly, the increased number of -OD group was observed when Ce-MgO-D(1.6) exposed to D<sub>2</sub> flow. **c, d,** In situ H-D isotope exchange DRIFTS spectra of MgO-D **c)** and Ce-MgO-D(1.6) **d)** exposed D<sub>2</sub> at 450 °C. Upon treatment with D<sub>2</sub>, the negative bands at 3200-3790 cm<sup>-1</sup> and the positive bands at 2380-2800 cm<sup>-1</sup> appeared simultaneously, displaying the expected H-D isotopic exchange for the MgO-H bands. Ce-MgO-D(1.6) catalyst shows significantly improved H-D exchange activity compared with MgO-D, confirming the enhanced hydrogen dissociation activity. The improved oxygen defects in Ce-MgO-D(1.6) increases the active H\* which may react with CO<sub>2</sub> to form formate species.
